# Supplementary material for: Changes in primary health care service experiences and urban–suburban disparities among Shanghai residents: a two-year comparative study(2023–2024)
Source: Research Square preprint supplement (doi:10.21203/rs.3.rs-6756840/v1), 2025-06-05
Supplement: Supplementary file 1 [file 3e59891ebba644b5d9d64f76.docx]

**Appendix 3. Explanation of the criteria for dividing**

**urban and suburban areas in Shanghai**

The regional division in this study strictly follows Chapter III "Spatial System" o-f the Shanghai Master Plan (2017–2035) (Document No. [2017] 12 of the Shanghai Municipal Government).[1]

**Central Urban Area**

Official scope: Areas within the Outer Ring Road (approximately 660 km²)

Included districts:

Entire districts: Huangpu, Jing'an, Xuhui, Changning, Yangpu, Hongkou, Putuo

Partial area: Pudong New Area within the Outer Ring Road (including 12 sub-districts such as Lujiazui and Weifang Xincun)

**Suburban Area**
Official scope: Areas outside the Outer Ring Road
Included districts:
Inner suburbs: Baoshan, Jiading, Minhang, Songjiang, Qingpu, Fengxian, Jinshan
Outer suburbs: Chongming District (Ecological Island)
Note: Pudong New Area beyond the Outer Ring Road (e.g., Zhangjiang Town, Chuansha New Town) is officially categorized as suburban.

**Definition of this study area**

Based on the principle of spatial continuity, this study makes the following technical adjustments to the official definitions:

The entire Pudong New Area is classified as urban

Inner and outer suburban areas are combined into a single "suburban" category

Merged Regional Categories and Administrative Districts

Urban: Huangpu, Jing'an, Xuhui, Changning, Yangpu, Hongkou, Putuo, and all of Pudong New Area

Suburban: Baoshan, Jiading, Minhang, Songjiang, Qingpu, Fengxian, Jinshan, and Chongming

**Reference**

[1] Shanghai Municipal People's Government. Notice on Issuing the Key Points of Shanghai's Primary Health Work in 2024 [EB/OL]. (2018-01-04) [2025-01-31]. [https://www.shanghai.gov.cn/nw42806/](https://www.shanghai.gov.cn/nw42806/" \t "_new)
