# Supplementary material for: Changes in primary health care service experiences and urban–suburban disparities among Shanghai residents: a two-year comparative study(2023–2024)
Source: Research Square preprint supplement (doi:10.21203/rs.3.rs-6756840/v1), 2025-06-05
Supplement: Supplementary file 2 [file 4a8f27a66627d24130f3aea6.docx]

| **Table 1.** Basic characteristics of survey respondents before and after PSM ***[n (%)]*** | | | | | | |  |
| --- | --- | --- | --- | --- | --- | --- | --- |
| **Variable** | **Before PSM (n=5162)** | | | **After PSM (n=4738)** | | |  |
|  | **2023** | **2024** | ***P-value*** | **2023** | **2024** | ***P-value*** | ***SMD*** |
| Sample Size | 2583 (50.4) | 2579 (49.6) |  | 2369 (50.0) | 2369 (50.0) |  |  |
| Gender |  | | 0.598 |  |  | 0.056 |  |
| Male | 739 (28.6) | 755 (29.3) |  | 665 (28.1) | 725 (30.6) |  | 0.055 |
| Female | 1844 (71.4) | 1824 (70.7) |  | 1704 (71.9) | 1644 (69.4) |  | -0.055 |
| Age |  |  | <0.001 |  |  | 0.734 |  |
| ≤ 65 years | 1609 (62.3) | 1797 (69.7) |  | 1576 (66.5) | 1587 (67.0) |  | 0.010 |
| >65 years | 974 (37.7) | 782 (30.3) |  | 793 (33.5) | 782 (33.0) |  | -0.010 |
| Area of Residence |  |  | 0.683 |  |  | 0.125 |  |
| Urban | 840 (32.5) | 825 (32.0) |  | 720 (30.4) | 769 (32.5) |  | 0.044 |
| Suburban | 1743 (67.5) | 1754 (68.0) |  | 1649 (69.6) | 1600 (67.5) |  | -0.044 |
| Occupation |  |  | <0.001 |  |  | 0.321 |  |
| Employed / Student | 1085 (42.0) | 1264 (49.0) |  | 1062 (44.8) | 1096 (46.3) |  | 0.010 |
| Retired | 1498 (58.0) | 1315 (51.0) |  | 1307 (55.2) | 1273 (53.7) |  | -0.010 |
| Type of Medical Insurance |  |  | 0.001 |  |  | 0.534 |  |
| Urban Resident Basic Medical Insurance | 1522 (58.9) | 1394 (54.1) |  | 1346 (56.8) | 1374 (58.0) |  | 0.024 |
| Urban Employee Basic Medical Insurance | 906 (35.1) | 1027 (39.8) |  | 873 (36.5) | 837 (35.3) |  | -0.032 |
| New Rural Cooperative Medical Scheme | 155 (6.0) | 158 (6.1) |  | 150 (6.34) | 158 (6.7) |  | 0.014 |
| Self-rated Health Status |  |  | <0.001 |  |  | 0.925 |  |
| Poor (Fair or Poor) | 917 (35.5) | 759 (29.4) |  | 745 (31.5) | 748 (31.6) |  | 0.003 |
| Good (Excellent or Good) | 1666 (64.5) | 1820 (70.6) |  | 1624 (68.6) | 1621 (68.4) |  | -0.003 |
| Number of Chronic Conditions |  |  | <0.001 |  |  | 0.887 |  |
| None | 1082 (41.9) | 1240 (48.1) |  | 1062 (44.8) | 1056 (44.6) |  | -0.005 |
| One chronic condition | 802 (31.1) | 761 (29.5) |  | 736 (31.1) | 751 (31.7) |  | 0.014 |
| Two or more chronic conditions | 699 (27.1) | 578 (22.0) |  | 571 (24.1) | 562 (23.7) |  | -0.009 |
| Presence of Long-term Psychological or Emotional Problems |  |  | 0.695 |  |  | 0.794 |  |
| Yes | 340 (13.2) | 330 (12.8) |  | 301(12.7) | 307 (13.0) |  | 0.008 |
| No | 2243 (86.8) | 2249 (87.2) |  | 2068 (87.3) | 2062 (87.0) |  | -0.008 |

**Note:** PSM: propensity score matching SMD: Standardized Mean Difference

| **Table 2.** Changes in PCAT dimension scores between 2023 and 2024 | | | | | |
| --- | --- | --- | --- | --- | --- |
| **Primary care dimensions** | **Mean±SD (2023)** | **Mean±SD (2024)** | ***P-value*** | **Δ Change** | **Ranking of changes** |
| 1. First-contact utilisation | 3.82 ± 0.40 | 3.90±0.27 | <0.0001 | 0.09 | 5 |
| 2. First-contact accessibility | 3.58 ± 0.48 | 3.72 ± 0.37 | <0.0001 | 0.15 | 3 |
| 3.0ngoing care | 3.66 ± 0.46 | 3.81 ± 0.35 | <0.0001 | 0.15 | 3 |
| 4. Coordination (Referral system) | 3.68 ± 0.53 | 3.86 ± 0.32 | <0.0001 | 0.18 | 2 |
| 5. Coordination (information system) | 3.86 ± 0.35 | 3.89 ± 0.29 | 0.001 | 0.03 | 7 |
| 6. Comprehensiveness (Services available) | 3.59 ± 0.60 | 3.82 ± 0.35 | <0.0001 | 0.23 | 1 |
| 7. Comprehensiveness (Services provided) | 3.78 ± 0.35 | 3.90 ± 0.28 | <0.0001 | 0.12 | 4 |
| 8. Family-centredness | 3.79 ± 0.41 | 3.88 ± 0.30 | <0.0001 | 0.08 | 6 |
| 9. Community orientation | 3.66 ± 0.51 | 3.82 ± 0.36 | <0.0001 | 0.15 | 3 |
| 10. Cultural competence | 3.69 ± 0.54 | 3.82 ± 0.41 | <0.0001 | 0.12 | 4 |

**Note:** PCAT: Primary care assessment tool

| **Table 3.** Changes in the 10 dimensions of the PCAT in urban and suburban areas after PSM for 2023 and 2024 | | | | | | | | | | |
| --- | --- | --- | --- | --- | --- | --- | --- | --- | --- | --- |
|  | **2023** | | | | ***2024*** | | | | ***∣ΔChange∣*** | **Ranking of Δ changes** |
| **Primary care dimensions** | **Urban (n=720)** | **Suburban**  **(n=1649)** | ***P-value*** | **Change** | **Urban (n=769)** | **Suburban**  **(n=1600)** | ***P-value*** | **Change** |
| 1.First-contact utilization | 3.85±0.33 | 3.81±0.42 | 0.023 | 0.04 | 3.91±0.24 | 3.91±0.26 | 0.63 | 0.00 | 0.04 | 5 |
| 2.First-contact accessibility | 3.51±0.50 | 3.63±0.46 | ＜0.001 | -0.12 | 3.72±0.38 | 3.73±0.37 | 0.638 | -0.01 | 0.11 | 1 |
| 3.0ngoing care | 3.67±0.44 | 3.66±0.46 | 0.591 | 0.01 | 3.86±0.30 | 3.79±0.36 | ＜0.001 | 0.07 | 0.06 | 3 |
| 4.Coordination (Referral system) | 3.74±0.46 | 3.65±0.46 | 0.019 | 0.09 | 3.89±0.31 | 3.85±0.33 | 0.063 | 0.04 | 0.05 | 4 |
| 5.Coordination (information system) | 3.87±0.32 | 3.85±0.36 | 0.278 | 0.02 | 3.90±0.28 | 3.90±0.28 | 0.947 | 0.00 | 0.02 | 6 |
| 6.Comprehensiveness (Services available) | 3.55±0.61 | 3.63±0.57 | 0.003 | -0.10 | 3.82±0.34 | 3.82±0.36 | 0.772 | 0.00 | 0.10 | 2 |
| 7.Comprehensiveness (Services provided) | 3.81±0.30 | 3.77±0.36 | 0.009 | 0.04 | 3.92±0.25 | 3.89±0.29 | 0.007 | 0.03 | 0.01 | 7 |
| 8.Family-centeredness | 3.82±0.37 | 3.79±0.41 | 0.075 | 0.03 | 3.89±0.29 | 3.87±0.30 | 0.059 | 0.02 | 0.01 | 7 |
| 9.Community orientation | 3.68±0.48 | 3.66±0.53 | 0.262 | 0.02 | 3.84±0.34 | 3.81±0.35 | 0.018 | 0.03 | 0.01 | 7 |
| 10.Cultural competence | 3.74±0.50 | 3.68±0.55 | 0.011 | 0.06 | 3.85±0.38 | 3.80±0.41 | 0.009 | 0.05 | 0.01 | 7 |

| **Table 4.** Multivariate regression analysis of the impact of different variables on the total PCAT score after PSM in the overall population | | | | | | |
| --- | --- | --- | --- | --- | --- | --- |
| **Variable**  **(Reference Category)** | **B** | **SE** | **Beta** | ***t-value*** | ***P-value*** | ***95% CI*** |
| **Gender** |  |  |  |  |  |  |
| Female (Male as reference) | 0.402 | 0.329 | 0.018 | 1.224 | 0.221 | [-0.242, 1.046] |
| **Age** |  |  |  |  |  |  |
| >65 years (≤65 years as reference) | 0.550 | 0.369 | 0.025 | 1.490 | 0.136 | [-0.174, 1.274] |
| **Living Area** |  |  |  |  |  |  |
| Suburban (Urban as reference) | -1.593 | 0.320 | -0.073 | -4.974 | ＜0.001 | [-2.221, -0.965] |
| **Occupation** |  |  |  |  |  |  |
| Retired (Employed/Student as reference) | -0.020 | 0.348 | -0.001 | -0.058 | 0.954 | [-0.703, 0.662] |
| **Type of Health Insurance** |  |  |  |  |  |  |
| Urban Employee Basic Medical Insurance (Urban Resident Basic Medical Insurance as reference) | -0.540 | 0.322 | -0.025 | -1.676 | 0.094 | [-1.172, 0.092] |
| New Rural Cooperative Medical Scheme (Urban Resident Basic Medical Insurance as reference) | -0.409 | 0.623 | -0.010 | -0.657 | 0.511 | [-1.631, 0.812] |
| **Presence of Long-term Psychological or Emotional Problems** |  |  |  |  |  |  |
| Yes (No as reference) | 2.061 | 0.451 | 0.068 | 4.567 | ＜0.001 | [1.176, 2.946] |
| **Chronic Diseases** |  |  |  |  |  |  |
| One Chronic Disease  (None as reference) | 0.498 | 0.359 | 0.023 | 1.389 | 0.165 | [-0.205, 1.201] |
| Two or More Chronic Diseases (None as reference) | 1.937 | 0.433 | 0.081 | 4.469 | ＜0.001 | [1.087, 2.786] |
| **Self-rated Health Status** |  |  |  |  |  |  |
| Excellent or Good  (Fair + Poor as reference) | 2.712 | 0.333 | 0.124 | 8.134 | ＜0.001 | [2.058, 3.365] |
