# Supplementary material for: Changes in primary health care service experiences and urban–suburban disparities among Shanghai residents: a two-year comparative study(2023–2024)
Source: Research Square preprint supplement (doi:10.21203/rs.3.rs-6756840/v1), 2025-06-05
Supplement: Supplementary file 3 [file 86230c2523367718b59ad720.docx]

**Appendix 1 Summary of the 2023 Survey Results on the Experiences of Permanent Residents in Shanghai with Primary Healthcare Services**

1. Your gender:

| Options | Subtotal | Percentage |
| --- | --- | --- |
| Male | 762 | 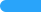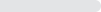29.3% |
| Female | 1839 | 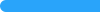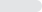70.7% |
| Number of valid responses for this question | 2601 |  |

2.Your age (this question was conducted in an open-ended format, and categorized for statistical analysis as follows):

| Categories: | Subtotal | Percentage |
| --- | --- | --- |
| ＞65 years | 1797 | 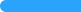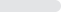69.09% |
| ≤65 years | 804 | 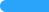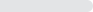30。91% |
| Number of valid responses for this question | 2601 |  |

1. In which district is your community health service center located (within Shanghai)?

| Options: | Subtotal | Percentage |
| --- | --- | --- |
| Baoshan District | 185 | 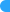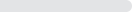7.11% |
| Chongming District | 197 | 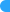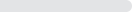7.57% |
| Fengxian District | 182 | 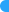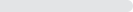7% |
| Hongkou District | 79 | 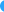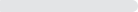3.04% |
| Huangpu District | 102 | 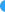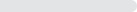3.92% |
| Jiading District | 135 | 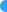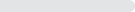5.19% |
| Jinshan District | 113 | 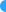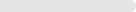4.34% |
| Jing'an District | 150 | 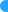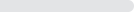5.77% |
| Minhang District | 145 | 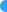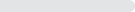5.57% |
| Pudong New Area | 495 | 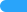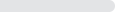19.03% |
| Putuo District | 135 | 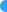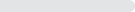5.19% |
| Qingpu District | 126 | 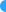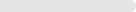4.84% |
| Songjiang District | 187 | 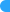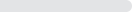7.19% |
| Xuhui District | 131 | 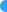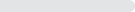5.04% |
| Yangpu District | 135 | 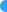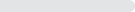5.19% |
| Changning District | 104 | 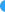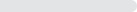4% |
| Number of valid responses for this question | 2601 |  |

4. Your occupation:

| Options: | Subtotal | Percentage |
| --- | --- | --- |
| Government official/public servant | 35 | 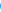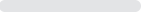1.35% |
| Permanent employee/full-time staff | 836 | 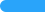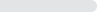32.14% |
| Temporary/part-time staff | 169 | 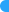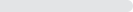6.5% |
| Laid-off/unemployed | 23 | 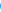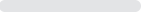0.88% |
| Farmer | 156 | 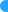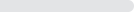6% |
| Retired | 1335 | 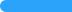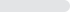51.33% |
| Other (please specify) | 47 | 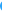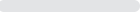1.81% |
| Number of valid responses for this question | 2601 |  |

5. In the past 12 months, how have your medical expenses been paid?

| Options: | Subtotal | Percentage |
| --- | --- | --- |
| Urban Resident Basic Medical Insurance | 1372 | 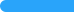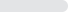52.75% |
| Urban Employee Basic Medical Insurance | 1030 | 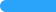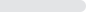39.6% |
| New Rural Cooperative Medical Insurance | 160 | 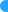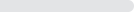6.15% |
| Out-of-pocket or commercial insurance | 23 | 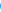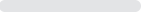0.88% |
| Other (please specify, e.g., government-funded medical care) | 16 | 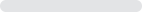0.62% |
| Number of valid responses for this question | 2601 |  |

6. How would you rate your current health status?

| Options: | Subtotal | Percentage |
| --- | --- | --- |
| Excellent | 610 | 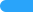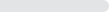23.45% |
| Good | 1217 | 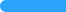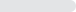46.79% |
| Fair | 745 | 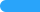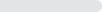28.64% |
| Poor | 29 | 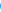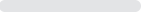1.11% |
| Number of valid responses for this question | 2601 |  |

7.Do you have any chronic diseases?

| Options: | Subtotal | Percentage |
| --- | --- | --- |
| YES | 1360 | 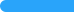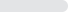52.29% |
| NO | 1241 | 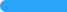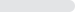47.71% |
| Number of valid responses for this question | 2601 |  |

8.How many types of chronic diseases do you have?

| Options: | Subtotal | Percentage |
| --- | --- | --- |
| One | 765 | 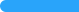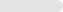56.25% |
| Two | 416 | 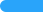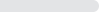30.59% |
| Three | 131 | 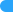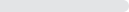9.63% |
| Four | 32 | 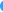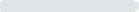2.35% |
| Five or more | 16 | 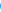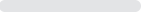1.18% |
| Number of valid responses for this question | 1360 |  |

1. Do you have any physical, psychological, or emotional problems that have lasted or are likely to last more than one year?

| Options: | Subtotal | Percentage |
| --- | --- | --- |
| Yes | 336 | 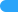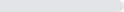12.92% |
| No | 2140 | 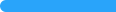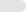82.28% |
| Not sure / Cannot remember | 125 | 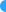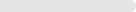4.81% |
| Number of valid responses for this question | 2601 |  |

| Question \ Options | Definitely yes | Probably yes | Probably not | Definitely not | Not sure / Cannot remember |
| --- | --- | --- | --- | --- | --- |
| 10. When you require a routine general health check-up, do you first visit a community health service center before seeking care from other medical institutions? | 2349(90.31%) | 216(8.3%) | 23(0.88%) | 5(0.19%) | 8(0.31%) |
| 11. When new health issues arise, do you initially consult your community general practitioner or family doctor before turning to other medical institutions? | 2426(93.27%) | 159(6.11%) | 6(0.23%) | 5(0.19%) | 5(0.19%) |
| 12. When you need to consult a specialist, is your community general practitioner or family doctor able to provide a referral? | 2362(90.81%) | 196(7.54%) | 23(0.88%) | 2(0.08%) | 18(0.69%) |
| 13. During working hours, if you fall ill, will your community general practitioner or family doctor provide medical care on the same day? | 2343(90.08%) | 227(8.73%) | 18(0.69%) | 2(0.08%) | 11(0.42%) |
| 14. During their working hours, can you obtain timely medical advice from your community general practitioner or family doctor via telephone or other means of communication if needed? | 2371(91.16%) | 208(8%) | 9(0.35%) | 5(0.19%) | 8(0.31%) |
| 15. Outside of regular working hours, if you become ill, are you able to contact your community general practitioner, family doctor, or their colleagues via telephone or similar means? | 2264(87.04%) | 281(10.8%) | 36(1.38%) | 10(0.38%) | 10(0.38%) |
| 16. If you become ill at night, is there a doctor available at the community health center or for home visits during nighttime hours? | 1362(52.36%) | 638(24.53%) | 293(11.26%) | 183(7.04%) | 125(4.81%) |
| 17. When visiting the community health service center, are you consistently treated by the same general practitioner each time? | 1861(71.55%) | 574(22.07%) | 133(5.11%) | 17(0.65%) | 16(0.62%) |
| 18. If you have health concerns, can you contact, via telephone or WeChat, a general practitioner or nurse who is familiar with your personal medical history? | 2320(89.2%) | 244(9.38%) | 21(0.81%) | 9(0.35%) | 7(0.27%) |
| 19. From the perspective of interpersonal relationships, does your general practitioner or family doctor have a personal familiarity with you, or do they regard you merely as a patient with medical needs? | 2216(85.2%) | 330(12.69%) | 31(1.19%) | 8(0.31%) | 16(0.62%) |
| 20. Does your general practitioner or family doctor understand the health issues that are most important to you? | 2338(89.89%) | 235(9.03%) | 16(0.62%) | 3(0.12%) | 9(0.35%) |

21.Have you recently consulted a doctor from a department of a general hospital or received other medical or health services?

| Options: | Subtotal | Percentage |
| --- | --- | --- |
| Yes | 1076 | 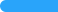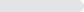41.37% |
| No (Skip to Question 26) | 1410 | 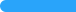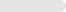54.21% |
| Not sure / Cannot remember (Skip to Question 26) | 115 | 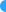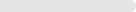4.42% |
| Number of valid responses for this question | 2601 |  |

If you have visited a general hospital:

| Question \ Options | Definitely yes | Probably yes | Probably not | Definitely not | Not sure / Cannot remember |
| --- | --- | --- | --- | --- | --- |
| 22. Has your general practitioner discussed with you the option of visiting other medical institutions (such as general hospitals) for the treatment of your condition? | 947(88.01%) | 112(10.41%) | 7(0.65%) | 0(0%) | 10(0.93%) |
| 23. Does your general practitioner or their colleague assist you in making appointments with specific departments in general hospitals? | 932(86.62%) | 120(11.15%) | 11(1.02%) | 1(0.09%) | 12(1.12%) |
| 24. Does your general practitioner provide relevant information about your medical condition to the doctors in the general hospital? | 927(86.15%) | 123(11.43%) | 14(1.3%) | 0(0%) | 12(1.12%) |
| 25. After receiving treatment or other health services from a department in a general hospital, does your general practitioner follow up with you about your experience? | 967(89.87%) | 97(9.01%) | 6(0.56%) | 0(0%) | 6(0.56%) |

| Question \ Options | Definitely yes | Probably yes | Probably not | Definitely not | Not sure / Cannot remember |
| --- | --- | --- | --- | --- | --- |
| 26. When visiting your community general practitioner or family doctor, do you bring your personal medical records, such as vaccination history or medical booklets? | 2344(90.12%) | 226(8.69%) | 18(0.69%) | 6(0.23%) | 7(0.27%) |
| 27. If necessary, are you able to access your previous medical visit records? | 2390(91.89%) | 192(7.38%) | 5(0.19%) | 2(0.08%) | 12(0.46%) |
| 28. Each time you visit your general practitioner, are you able to view your medical records? | 2321(89.23%) | 243(9.34%) | 22(0.85%) | 1(0.04%) | 14(0.54%) |

Below are medical services that you or your family members may sometimes need. For each item, please indicate whether your general practitioner is able to provide the service.

| Question \ Options | Definitely yes | Probably yes | Probably not | Definitely not | Not sure / Cannot remember |
| --- | --- | --- | --- | --- | --- |
| 29. Immunizations | 2270(87.27%) | 240(9.23%) | 47(1.81%) | 17(0.65%) | 27(1.04%) |
| 30. Family planning or contraceptive methods | 2360(90.73%) | 214(8.23%) | 18(0.69%) | 3(0.12%) | 6(0.23%) |
| 31. Mental health counseling | 2267(87.16%) | 276(10.61%) | 34(1.31%) | 12(0.46%) | 12(0.46%) |
| 32. Wound suturing | 2038(78.35%) | 339(13.03%) | 125(4.81%) | 49(1.88%) | 50(1.92%) |

When you consult your general practitioner, do they discuss the following topics with you?

| Question \ Options | Definitely yes | Probably yes | Probably not | Definitely not | Not sure / Cannot remember |
| --- | --- | --- | --- | --- | --- |
| 33. Advice on healthy eating and getting adequate sleep | 2369(91.08%) | 213(8.19%) | 15(0.58%) | 2(0.08%) | 2(0.08%) |
| 34. Home safety, such as fall prevention and safe medication storage | 2277(87.54%) | 267(10.27%) | 37(1.42%) | 6(0.23%) | 14(0.54%) |
| 35. How to manage family conflicts | 2319(89.16%) | 248(9.53%) | 21(0.81%) | 2(0.08%) | 11(0.42%) |
| 36. Recommendations for moderate physical activity | 2387(91.77%) | 198(7.61%) | 12(0.46%) | 1(0.04%) | 3(0.12%) |
| 37. Reviewing and discussing the medications you are currently taking | 2432(93.5%) | 152(5.84%) | 9(0.35%) | 2(0.08%) | 6(0.23%) |

| Question \ Options | Definitely yes | Probably yes | Probably not | Definitely not | Not sure / Cannot remember |
| --- | --- | --- | --- | --- | --- |
| 38. When proposing a treatment plan for you or your family members, does your general practitioner seek your input or opinion? | 2372(91.2%) | 215(8.27%) | 10(0.38%) | 0(0%) | 4(0.15%) |
| 39. Has your general practitioner ever asked about hereditary conditions or issues within your family? | 2358(90.66%) | 218(8.38%) | 11(0.42%) | 5(0.19%) | 9(0.35%) |
| 40. If deemed helpful, would your general practitioner meet with other members of your family? | 2193(84.31%) | 348(13.38%) | 43(1.65%) | 7(0.27%) | 10(0.38%) |
| 41. Has your general practitioner or family doctor ever conducted a home visit for you? | 2022(77.74%) | 421(16.19%) | 94(3.61%) | 28(1.08%) | 36(1.38%) |
| 42. Is your general practitioner aware of the major health issues faced by the community or neighborhood in which you live? | 2263(87%) | 295(11.34%) | 17(0.65%) | 4(0.15%) | 22(0.85%) |
| 43. In order to provide better care, does your general practitioner consider and incorporate opinions or advice from other doctors? | 2293(88.16%) | 281(10.8%) | 10(0.38%) | 3(0.12%) | 14(0.54%) |
| 44. Would you recommend your general practitioner to your friends or family members? | 2392(91.96%) | 184(7.07%) | 15(0.58%) | 3(0.12%) | 7(0.27%) |
| 45. Would you recommend your family doctor to people who prefer using traditional remedies or self-prepared medicines (e.g., Traditional Chinese Medicine)? | 2096(80.58%) | 328(12.61%) | 98(3.77%) | 59(2.27%) | 20(0.77%) |
