# Supplementary material for: Changes in primary health care service experiences and urban–suburban disparities among Shanghai residents: a two-year comparative study(2023–2024)
Source: Research Square preprint supplement (doi:10.21203/rs.3.rs-6756840/v1), 2025-06-05
Supplement: Supplementary file 4 [file 8b0c5be3758731f781b3851c.docx]

**Appendix 1 Summary of the 2023 Survey Results on the Experiences of Permanent Residents in Shanghai with Primary Healthcare Services**

1. Your gender:

| Options | Subtotal | Percentage |
| --- | --- | --- |
| Male | 744 | 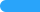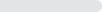28.64% |
| Female | 1854 | 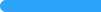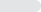71.36% |
| Number of valid responses for this question | 2598 |  |

2.Your age (this question was conducted in an open-ended format, and categorized for statistical analysis as follows):

| Categories: | Subtotal | Percentage |
| --- | --- | --- |
| ＞65 years | 1611 | 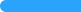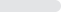62.01% |
| ≤65 years | 987 | 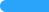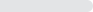37.99% |
| Number of valid responses for this question | 2598 |  |

1. In which district is your community health service center located (within Shanghai)?

| Options: | Subtotal | Percentage |
| --- | --- | --- |
| Baoshan District | 185 | 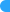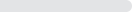7.12% |
| Chongming District | 186 | 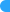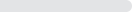7.16% |
| Fengxian District | 198 | 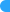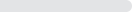7.62% |
| Hongkou District | 100 | 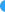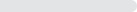3.85% |
| Huangpu District | 100 | 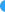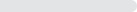3.85% |
| Jiading District | 139 | 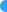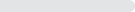5.35% |
| Jinshan District | 112 | 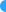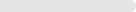4.31% |
| Jing'an District | 159 | 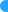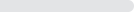6.12% |
| Minhang District | 144 | 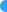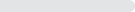5.54% |
| Pudong New Area | 496 | 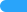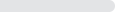19.09% |
| Putuo District | 129 | 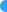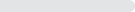4.97% |
| Qingpu District | 125 | 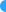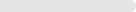4.81% |
| Songjiang District | 167 | 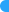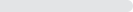6.43% |
| Xuhui District | 126 | 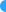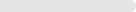4.85% |
| Yangpu District | 124 | 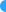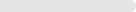4.77% |
| Changning District | 108 | 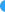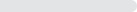4.16% |
| Number of valid responses for this question | 2598 |  |

4. Your occupation:

| Options: | Subtotal | Percentage |
| --- | --- | --- |
| Government official/public servant | 27 | 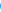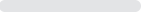1.04% |
| Permanent employee/full-time staff | 668 | 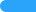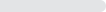25.71% |
| Temporary/part-time staff | 158 | 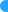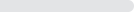6.08% |
| Laid-off/unemployed | 36 | 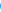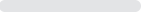1.39% |
| Farmer | 141 | 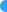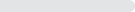5.43% |
| Retired | 1512 | 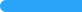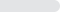58.2% |
| Other (please specify) | 56 | 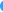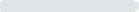2.16% |
| Number of valid responses for this question | 2598 |  |

5. In the past 12 months, how have your medical expenses been paid?

| Options: | Subtotal | Percentage |
| --- | --- | --- |
| Urban Resident Basic Medical Insurance | 1483 | 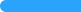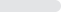57.08% |
| Urban Employee Basic Medical Insurance | 910 | 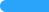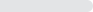35.03% |
| New Rural Cooperative Medical Insurance | 155 | 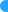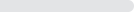5.97% |
| Out-of-pocket or commercial insurance | 33 | 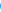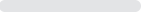1.27% |
| Other (please specify, e.g., government-funded medical care) | 17 | 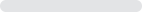0.65% |
| Number of valid responses for this question | 2598 |  |

6. How would you rate your current health status?

| Options: | Subtotal | Percentage |
| --- | --- | --- |
| Excellent | 477 | 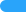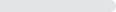18.36% |
| Good | 1200 | 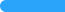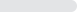46.19% |
| Fair | 878 | 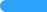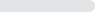33.8% |
| Poor | 43 | 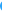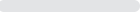1.66% |
| Number of valid responses for this question | 2598 |  |

7.Do you have any chronic diseases?

| Options: | Subtotal | Percentage |
| --- | --- | --- |
| Yes | 1515 | 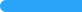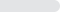58.31% |
| No | 1083 | 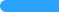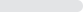41.69% |
| Number of valid responses for this question | 2598 |  |

8.How many types of chronic diseases do you have?

| Options: | Subtotal | Percentage |
| --- | --- | --- |
| One | 807 | 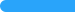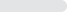53.27% |
| Two | 418 | 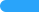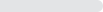27.59% |
| Three | 206 | 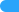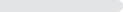13.6% |
| Four | 55 | 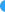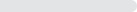3.63% |
| Five or more | 29 | 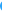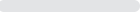1.91% |
| Number of valid responses for this question | 1515 |  |

1. Do you have any physical, psychological, or emotional problems that have lasted or are likely to last more than one year?

| Options: | Subtotal | Percentage |
| --- | --- | --- |
| Yes | 343 | 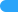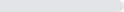13.2% |
| No | 2130 | 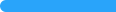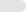81.99% |
| Not sure / Cannot remember | 125 | 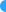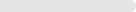4.81% |
| Number of valid responses for this question | 2598 |  |

| Question \ Options | Definitely yes | Probably yes | Probably not | Definitely not | Not sure / Cannot remember |
| --- | --- | --- | --- | --- | --- |
| 10. When you require a routine general health check-up, do you first visit a community health service center before seeking care from other medical institutions? | 2243(86.34%) | 288(11.09%) | 46(1.77%) | 17(0.65%) | 4(0.15%) |
| 11. When new health issues arise, do you initially consult your community general practitioner or family doctor before turning to other medical institutions? | 2274(87.53%) | 266(10.24%) | 35(1.35%) | 16(0.62%) | 7(0.27%) |
| 12. When you need to consult a specialist, is your community general practitioner or family doctor able to provide a referral? | 2164(83.29%) | 290(11.16%) | 62(2.39%) | 33(1.27%) | 49(1.89%) |
| 13. During working hours, if you fall ill, will your community general practitioner or family doctor provide medical care on the same day? | 2188(84.22%) | 333(12.82%) | 46(1.77%) | 11(0.42%) | 20(0.77%) |
| 14. During their working hours, can you obtain timely medical advice from your community general practitioner or family doctor via telephone or other means of communication if needed? | 2263(87.11%) | 247(9.51%) | 41(1.58%) | 23(0.89%) | 24(0.92%) |
| 15. Outside of regular working hours, if you become ill, are you able to contact your community general practitioner, family doctor, or their colleagues via telephone or similar means? | 2104(80.99%) | 336(12.93%) | 82(3.16%) | 44(1.69%) | 32(1.23%) |
| 16. If you become ill at night, is there a doctor available at the community health center or for home visits during nighttime hours? | 1005(38.68%) | 668(25.71%) | 383(14.74%) | 369(14.2%) | 173(6.66%) |
| 17. When visiting the community health service center, are you consistently treated by the same general practitioner each time? | 1693(65.17%) | 635(24.44%) | 209(8.04%) | 27(1.04%) | 34(1.31%) |
| 18. If you have health concerns, can you contact, via telephone or WeChat, a general practitioner or nurse who is familiar with your personal medical history? | 2199(84.64%) | 280(10.78%) | 70(2.69%) | 31(1.19%) | 18(0.69%) |
| 19. From the perspective of interpersonal relationships, does your general practitioner or family doctor have a personal familiarity with you, or do they regard you merely as a patient with medical needs? | 1826(70.28%) | 354(13.63%) | 149(5.74%) | 231(8.89%) | 38(1.46%) |
| 20. Does your general practitioner or family doctor understand the health issues that are most important to you? | 2263(87.11%) | 287(11.05%) | 39(1.5%) | 5(0.19%) | 4(0.15%) |

1. Have you recently consulted a doctor from a department of a general hospital or received other medical or health services?

| Options: | Subtotal | Percentage |
| --- | --- | --- |
| Yes | 918 | 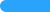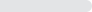35.33% |
| No (Skip to Question 26) | 1582 | 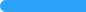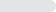60.89% |
| Not sure / Cannot remember (Skip to Question 26) | 98 | 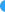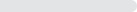3.77% |
| Number of valid responses for this question | 2598 |  |

If you have visited a general hospital:

| Question \ Options | Definitely yes | Probably yes | Probably not | Definitely not | Not sure / Cannot remember |
| --- | --- | --- | --- | --- | --- |
| 22. Has your general practitioner discussed with you the option of visiting other medical institutions (such as general hospitals) for the treatment of your condition? | 725(78.98%) | 142(15.47%) | 27(2.94%) | 13(1.42%) | 11(1.2%) |
| 23. Does your general practitioner or their colleague assist you in making appointments with specific departments in general hospitals? | 637(69.39%) | 186(20.26%) | 44(4.79%) | 24(2.61%) | 27(2.94%) |
| 24. Does your general practitioner provide relevant information about your medical condition to the doctors in the general hospital? | 673(73.31%) | 170(18.52%) | 32(3.49%) | 19(2.07%) | 24(2.61%) |
| 25. After receiving treatment or other health services from a department in a general hospital, does your general practitioner follow up with you about your experience? | 740(80.61%) | 144(15.69%) | 17(1.85%) | 10(1.09%) | 7(0.76%) |

| Question \ Options | Definitely yes | Probably yes | Probably not | Definitely not | Not sure / Cannot remember |
| --- | --- | --- | --- | --- | --- |
| 26. When visiting your community general practitioner or family doctor, do you bring your personal medical records, such as vaccination history or medical booklets? | 2341(90.11%) | 216(8.31%) | 21(0.81%) | 14(0.54%) | 6(0.23%) |
| 27. If necessary, are you able to access your previous medical visit records? | 2325(89.49%) | 214(8.24%) | 33(1.27%) | 6(0.23%) | 20(0.77%) |
| 28. Each time you visit your general practitioner, are you able to view your medical records? | 2234(85.99%) | 268(10.32%) | 51(1.96%) | 14(0.54%) | 31(1.19%) |

Below are medical services that you or your family members may sometimes need. For each item, please indicate whether your general practitioner is able to provide the service.

| Question \ Options | Definitely yes | Probably yes | Probably not | Definitely not | Not sure / Cannot remember |
| --- | --- | --- | --- | --- | --- |
| 29. Immunizations | 2236(86.07%) | 222(8.55%) | 60(2.31%) | 48(1.85%) | 32(1.23%) |
| 30. Family planning or contraceptive methods | 1703(65.55%) | 376(14.47%) | 162(6.24%) | 219(8.43%) | 138(5.31%) |
| 31. Mental health counseling | 2010(77.37%) | 363(13.97%) | 103(3.96%) | 64(2.46%) | 58(2.23%) |
| 32. Wound suturing | 1801(69.32%) | 331(12.74%) | 177(6.81%) | 178(6.85%) | 111(4.27%) |

When you consult your general practitioner, do they discuss the following topics with you?

| Question \ Options | Definitely yes | Probably yes | Probably not | Definitely not | Not sure / Cannot remember |
| --- | --- | --- | --- | --- | --- |
| 33. Advice on healthy eating and getting adequate sleep | 2387(91.88%) | 184(7.08%) | 18(0.69%) | 4(0.15%) | 5(0.19%) |
| 34. Home safety, such as fall prevention and safe medication storage | 2262(87.07%) | 282(10.85%) | 33(1.27%) | 11(0.42%) | 10(0.38%) |
| 35. How to manage family conflicts | 1454(55.97%) | 608(23.4%) | 284(10.93%) | 145(5.58%) | 107(4.12%) |
| 36. Recommendations for moderate physical activity | 2342(90.15%) | 224(8.62%) | 18(0.69%) | 8(0.31%) | 6(0.23%) |
| 37. Reviewing and discussing the medications you are currently taking | 2427(93.42%) | 146(5.62%) | 15(0.58%) | 3(0.12%) | 7(0.27%) |

| Question \ Options | Definitely yes | Probably yes | Probably not | Definitely not | Not sure / Cannot remember |
| --- | --- | --- | --- | --- | --- |
| 38. When proposing a treatment plan for you or your family members, does your general practitioner seek your input or opinion? | 2305(88.72%) | 250(9.62%) | 24(0.92%) | 9(0.35%) | 10(0.38%) |
| 39. Has your general practitioner ever asked about hereditary conditions or issues within your family? | 2275(87.57%) | 251(9.66%) | 30(1.15%) | 20(0.77%) | 22(0.85%) |
| 40. If deemed helpful, would your general practitioner meet with other members of your family? | 1929(74.25%) | 479(18.44%) | 82(3.16%) | 53(2.04%) | 55(2.12%) |
| 41. Has your general practitioner or family doctor ever conducted a home visit for you? | 1701(65.47%) | 485(18.67%) | 175(6.74%) | 155(5.97%) | 82(3.16%) |
| 42. Is your general practitioner aware of the major health issues faced by the community or neighborhood in which you live? | 2095(80.64%) | 355(13.66%) | 74(2.85%) | 20(0.77%) | 54(2.08%) |
| 43. In order to provide better care, does your general practitioner consider and incorporate opinions or advice from other doctors? | 2118(81.52%) | 389(14.97%) | 47(1.81%) | 10(0.38%) | 34(1.31%) |
| 44. Would you recommend your general practitioner to your friends or family members? | 2301(88.57%) | 238(9.16%) | 34(1.31%) | 16(0.62%) | 9(0.35%) |
| 45. Would you recommend your family doctor to people who prefer using traditional remedies or self-prepared medicines (e.g., Traditional Chinese Medicine)? | 1826(70.28%) | 427(16.44%) | 157(6.04%) | 139(5.35%) | 49(1.89%) |
